# Supplementary material for: Oxidative potential apportionment of atmospheric PM 1 : a new approach combining high-sensitive online analysers for chemical composition and offline OP measurement technique
Source: Copernicus journal article supplement (doi:10.5194/acp-24-3257-2024), 2024-03-15
Supplement: Supplementary file 1 [file acp-24-3257-2024-supplement.pdf]

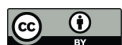

*Supplement of*

## **Oxidative potential apportionment of atmospheric PM<sub>1</sub>: a new approach combining high-sensitive online analysers for chemical composition and offline OP measurement technique**

**Julie Camman et al.**

*Correspondence to:* Benjamin Chazeau (benjamin.chazeau@psi.ch)

The copyright of individual parts of the supplement might differ from the article licence.

# Supplementary Information

## List of figures :

**Figure S1.** Percent of values above the MDL for each element measured with the Xact.

**Figure S2. (a)** Changes in  $\Delta Q/Q_{exp}$ ,  $\Delta UEV_{real}$  and  $\Delta UEV_{noisy}$  for n-(n+1)-factor PMF<sub>metals</sub> runs and **(b)**  $Q/Q_{exp}$ ,  $UEV_{real}$  and  $UEV_{noisy}$  for PMF<sub>metals</sub> runs from 1 to 8 factors. These PMF runs are performed for the WFP dataset. The box plots located in the blue dashed-line area represent the values for the finalized 6-factors bootstrap solution using the total metals dataset.

**Figure S3. (a)** Factors time series and **(b)** profiles from the PMF solution using the FDP dataset. The regional background factor profile was constrained with an a-value of 0.1.

**Figure S4.** Criteria scores for the 100 bootstrapped runs from the PMF<sub>metals</sub>. Each graph represents one criterion for the different factors. The blue markers are for the factor criterion scores and the black markers represent the second highest scores attributed to one of the remaining factors.

**Figure S5. (a)** NO<sub>x</sub>, SO<sub>2</sub> and O<sub>3</sub> concentration and **(b)** wind speed and direction during OP measurement period.

**Figure S6. (a)** Comparison between time series of PM<sub>1</sub> measured by FIDAS and time series of particulate fraction reconstituted by the sum of chemical components ( $r_s = 0.47$ ,  $p < 0.001$ ). **(b)** Contribution to PM<sub>1</sub> of chemical components (%) measured from 11<sup>th</sup> July 2018 to 25<sup>th</sup> July 2018 (included firework episode, n=91) by ToF-ACSM, Xact and aethalometer online analyzers.

**Figure S7. (a)** Average mass spectra profiles, **(b)** time-series, **(c)** pie chart contributions and **(d)** mean diurnal cycles (solid lines and error bars indicate the standard deviation) for the 5 factors from the PMF<sub>organics</sub> solution.

**Figure S8. (a)** Pie chart contributions and **(b)** average diurnal profiles of factors from the PMF<sub>metals</sub> analysis. For the diurnal plots the red dots correspond to the mean, the bands are the median, the bottom and top of the boxes represent the 25<sup>th</sup> and 75<sup>th</sup> percentile respectively, and the ends of the whiskers are for the 10<sup>th</sup> and 90<sup>th</sup> percentiles.

**Figure S9.** NWR plots for the different factors from the PMF<sub>metals</sub> analysis.

**Figure S10.** Probability density function of scaled residuals for the standalone ACSM\_OA, ACSM, AE33 and Xact datasets.

**Figure S11.** Box plots of dust resuspension factor concentrations for different relative humidity (RH) bins in %. The concentrations are enhanced under low RH conditions. The blue diamonds are the mean, the bars inside the boxes the median, the bottom and top of the boxes are the 25<sup>th</sup> and 75<sup>th</sup> percentile, respectively, and the ends of the whiskers are the 10<sup>th</sup> and 90<sup>th</sup> percentiles.

**Figure S12.** Criteria scores for the a-values sensitivity test runs from the PMF<sub>PM1</sub>. Each graph represents one criterion per factor. The grey markers are the unselected runs, the blue markers are the selected runs for the related factor and the green markers are the effectively chosen runs.

**Figure S13.** Number of accepted solutions based on the PMF<sub>PM1</sub> criteria list for the different a-values explored in the sensitivity test. A-values associated to the greatest number of validated solutions were

39 chosen for the bootstrap PMF runs (i.e. 0.4 for biomass burning, 0.1 for cooking and 0.05 for industrial  
40 constrained profiles).

41 **Figure S14.** Relative contributions of PM<sub>1</sub> factors profiles and unexplained variations from the PMF<sub>PM1</sub>  
42 analysis.

43 **Figure S15.** Comparison between the industrial metals profile from our study and ICP-MS profiles for  
44 the PM<sub>2.5</sub> fraction in the industrial area of Fos-sur-mer (Sylvestre et al., 2017). Complex n°1 is a cast iron  
45 converter complex, complex n°2 is a ore iron converter complex, complex n°3 is a blast furnace slag  
46 storage and complex n°4 is an ore terminal.

47 **Figure S16.** Average diurnal profiles for SO<sub>2</sub>, Sh-IndOA and the sum of industrial and shipping factors  
48 from the PMF<sub>metals</sub>.

49 **Figure S17.** NWR plots for each factor of the PMF<sub>PM1</sub> analysis.

50 **Figure S18.** Average factor profiles for the PMF<sub>PM1</sub> solution using OA factors, ACSM inorganic species,  
51 BC and metals as inputs. The sticks represent the normalized contribution of the variable to the factor  
52 (left axis) and markers show the normalized factor contribution to each variable (right axis).

53 **Figure S19.** Factor profiles from the PMF solution using organic m/z fragments, ACSM inorganic  
54 species, BC and metals as inputs. The sticks represent the normalized contribution of the variable to  
55 the factor (left axis) and markers show the normalized factor contribution to each variable (right axis).

56 **Figure S20.** Residuals values of WLS models for **(a)** OP<sub>AA</sub> and **(b)** OP<sub>DTT</sub>. An outlier point (07/19/2018  
57 03:00) was withdrawn to ensure homoscedasticity of residuals values.

58 **Figure S21.** Mean contribution of the sources identified by PMF<sub>PM1</sub> over the OP sampling campaign  
59 (n = 86) to **(a)** OP<sub>AA</sub>, **(b)** OP<sub>DTT</sub>, **(c)** PM<sub>1</sub>. Error bars represents the standard deviation of the data  
60 distribution.

61

62 *List of tables :*

63 **Table S1.** List of elements measured with the Xact, their respective MDLs and the percent of  
64 measurements above the MDL.

65 **Table S2.** Summary of statistics for the different PMF tests carried out on the WFP datasets of metals.  
66 18 downweight conditions were tested for the PMF inputs. The matrix including a S2N downweight  
67 and errors below MDLs downweighted with  $\alpha_i = 2 \times r_{p95}$  (test n°12) was selected as final inputs.

68 **Table S3.** Intrinsic  $OP_{AA}$  and  $OP_{DTT}$  ( $OP_m$ ) provided by weighted robust linear regression with an M-  
69 estimator expressed in  $nmol.min^{-1}.\mu g^{-1}$  of sources provided by **(a)**  $PMF_{organics}$  (scenario 1) and **(b)**  
70  $PMF_{metals}$  (scenario 2) over the OP sampling campaign ( $n = 90$ ). Values are the mean  $\pm$  standard deviation  
71 from bootstraps runs for both OP assays. The model parameters  $R^2_{adjusted}$  and Pearson's correlation  
72 between model OP and observed OP are mentioned on the right.

73 **Table S4.** Factors identification for the  $PMF_{PMI}$  analyses between 5 and 12 factors. The green cells  
74 represent the base case identification for the related factors. The remaining undefined factors for each  
75 solution corresponded to mixed profiles not attributed to a specific source. The red squares are the base  
76 cases used as reference profile constraints.

77 **Table S5.**  $R^2$  and slope values for the comparison of the  $PMF_{PMI}$  (OA factors + metals + ions + BC) factors  
78 with  $PMF^2$  factors. The relative contributions are also represented (in %).

79 **Table S6.** Pearson's correlation coefficients between  $OP_{VAA}$  and  $OP_{VDTT}$  to the PM sources identified by  
80  $PMF_{PMI}$  model.

81

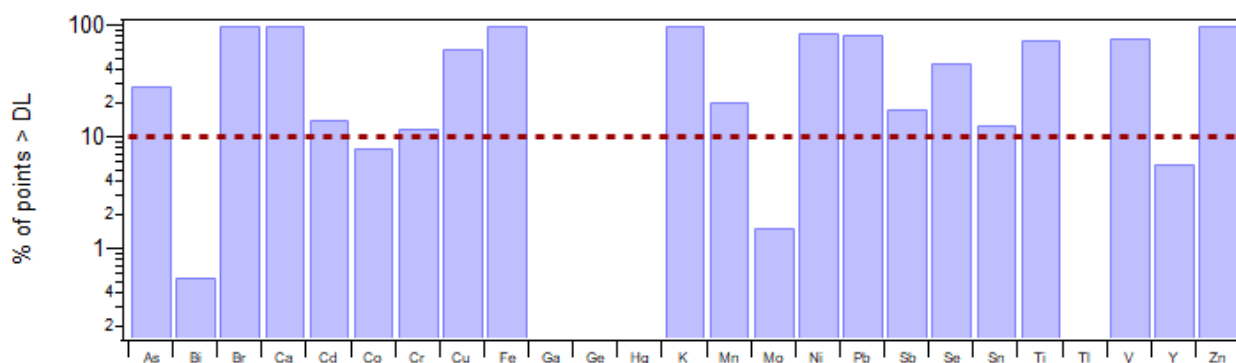

82

83 **Figure S1.** Percent of values above the MDL for each element measured with the Xact.

84

85

86

| Elements | MDL (ng.m <sup>-3</sup> ) | Values > MDL (%) |
|----------|---------------------------|------------------|
| As       | 0.11                      | 29.3             |
| Bi       | 0.23                      | 0.6              |
| Br       | 0.18                      | 99.8             |
| Ca       | 0.52                      | 99.5             |
| Cd       | 4.4                       | 14.4             |
| Co       | 0.24                      | 8.1              |
| Cr       | 0.2                       | 12.0             |
| Cu       | 0.14                      | 63.3             |
| Fe       | 0.3                       | 100              |
| Ga       | 0.1                       | 0                |
| Ge       | 0.1                       | 0                |
| Hg       | 0.21                      | 0.2              |
| K        | 2                         | 100              |
| Mn       | 0.25                      | 20.6             |
| Mo       | 0.84                      | 1.5              |
| Ni       | 0.17                      | 86.6             |
| Pb       | 0.22                      | 84.8             |
| Sb       | 9                         | 18.0             |
| Se       | 0.14                      | 46.4             |
| Sn       | 7.1                       | 12.8             |
| Ti       | 0.28                      | 76.0             |
| Tl       | 0.2                       | 0                |
| V        | 0.21                      | 76.7             |
| Y        | 0.48                      | 5.8              |
| Zn       | 0.12                      | 100              |

87 **Table S1.** List of elements measured with the Xact, their respective MDLs and the percent of  
 88 measurements above the MDL.

89

90 **Sect. S1: Error matrix downweights for PMF<sub>metals</sub>**

91 Polissar et al. (1998) (Polissar et al., 1998a) first introduced an uncertainty of  $5/6 \times MDL$  for data below  
92 MDL (set to  $MDL/2$ ). The purpose was to provide relative errors for these values 2 to 5 times greater  
93 than the maximum relative errors of the data exceeding the MDLs. Here, several uncertainties values  
94 were tested for data below MDL by conducted a panel of PMF runs with 2 to 8 factors. The errors were  
95 calculated by applying a downweight coefficient ( $\alpha$ ) to the previous formula from Polissar et al. (1998)  
96 (Polissar et al., 1998a):

97 
$$\sigma_{i,j} = \alpha \times \frac{5}{6} MDL_i \text{ if } x_{i,j} < MDL_i \quad (S1)$$

98 For all the elements  $i$ ,  $\alpha$  was set to 6, 10 and 14 in order to obtain a ratio of 2, 3.5 and 5, respectively,  
99 with the maximum relative error found in the dataset, i.e. 476% for Sn (the value corresponds to the 95<sup>th</sup>  
100 percentile instead of the max value to avoid outlier effects). Another test consisted in applying a  
101 dependant  $\alpha$  based on the maximum relative error (95<sup>th</sup> percentile) for each element  $i$  ( $r_{p95}$ ):

102 
$$\alpha_i = 2 \times r_{p95} \quad (S2)$$

103 Where 2 was used to determine the same ratio between the relative error of data below the MDLs from  
104 Polissar et al. (1998) equation (167 %, considering the  $\frac{5}{6}MDL/\frac{1}{2}MDL$  calculation) and the maximum  
105 relative error for the data greater than the MDLs (50%) found in Polissar et al. (1998) (Polissar et al.,  
106 1998a) dataset. A last test was performed with  $\alpha=1$  (i.e. no downweight) for the comparison. Each PMF  
107 analysis was also conducted with and without 1/S2N downweight (Visser et al., 2015). The tests were  
108 performed on the WFP dataset and the results were synthetized in Table S2. Here we focus on the 5F-  
109 solutions results as they resolved unmixed factors and represented a statistically relevant number of  
110 factor (see section 2.4.2 in the main text).

111 For all PMF solutions, applying the 1/S2N downweight provided lower scaled residuals as shown by  
112 the narrower width of fits. The solutions with  $\alpha=1$  (i.e. no errors downweight for data  $<MDLs$ ) were  
113 discarded due to less satisfactory mass reconstructions and residuals and higher average unexplained  
114 variations. The unexplained variation is a dimensionless quantity which indicates how much variation  
115 (in time or in each variable) is not explained by the factors (Canonaco et al., 2013). Thus, the unexplained  
116 variation of the  $i^{\text{th}}$  point for the factor  $k^{\text{th}}$  is:

117 
$$UEV_{ik} = \frac{\sum_{j=1}^m (|e_{ij}|/\sigma_{ij})}{\sum_{j=1}^m ((\sum_{k=1}^p |g_{ik} \cdot f_{kj}| + e_{ij})/\sigma_{ij})} \quad (S3)$$

118  $UEV$  is further calculated for data with  $S2N > 2$  ( $UEV_{\text{real}}$ ) or for noisy data ( $UEV_{\text{noisy}}$ ).

119 The remaining tests gave comparable explained variations, mass reconstitutions and residuals. The  
 120 uncertainties calculated with  $\alpha_i = 2 \times r_{p95}$  (test n°12 in Table S2) were finally selected as error inputs  
 121 for the data below the MDLs since this solutions resolved 5 unmixed factors with the best mean and  
 122 median diurnal patterns for each identified source.

123

| Tests              | N° | Unexplained Variations |               |              | $\Sigma_{\text{factors vs } \Sigma_{\text{metals}}}$ |                   | Sc residuals |             |
|--------------------|----|------------------------|---------------|--------------|------------------------------------------------------|-------------------|--------------|-------------|
|                    |    | F5<br>EV_Noise         | F5<br>EV_Real | F5<br>EV_Sum | F5 Slope                                             | F5 R <sup>2</sup> | F5 center    | F5<br>width |
| noDW_noS2N         | 1  | 0.215                  | 0.049         | 0.264        | 0.987                                                | 0.958             | 0.094        | 0.337       |
| noDW_S2N           | 2  | 0.221                  | 0.042         | 0.263        | 0.987                                                | 0.959             | 0.059        | 0.201       |
| DW6_ALL_noS2N      | 3  | 0.187                  | 0.048         | 0.235        | 0.989                                                | 0.973             | -0.023       | 0.137       |
| DW6_ALL_S2N        | 4  | 0.203                  | 0.033         | 0.236        | 1.004                                                | 0.985             | -0.002       | 0.014       |
| DW6_SPEC_noS2N     | 5  | 0.187                  | 0.041         | 0.228        | 1.000                                                | 0.979             | -0.010       | 0.089       |
| DW6_SPEC_S2N       | 6  | 0.203                  | 0.033         | 0.236        | 1.003                                                | 0.986             | -0.002       | 0.014       |
| DW10_ALL_noS2N     | 7  | 0.187                  | 0.040         | 0.227        | 1.010                                                | 0.993             | -0.020       | 0.074       |
| DW10_ALL_S2N       | 8  | 0.201                  | 0.033         | 0.234        | 1.015                                                | 1.000             | -0.002       | 0.005       |
| DW10_SPEC_noS2N    | 9  | 0.187                  | 0.040         | 0.227        | 1.010                                                | 0.993             | -0.020       | 0.073       |
| DW10_SPEC_S2N      | 10 | 0.201                  | 0.033         | 0.234        | 1.014                                                | 1.000             | -0.002       | 0.005       |
| Roll_DW_ALL_noS2N  | 11 | 0.188                  | 0.041         | 0.229        | 1.007                                                | 0.988             | -0.013       | 0.091       |
| Roll_DW_ALL_S2N    | 12 | 0.203                  | 0.034         | 0.237        | 1.010                                                | 0.995             | -0.001       | 0.005       |
| Roll_DW_SPEC_noS2N | 13 | 0.187                  | 0.041         | 0.228        | 1.006                                                | 0.988             | -0.013       | 0.091       |
| Roll_DW_SPEC_S2N   | 14 | 0.203                  | 0.034         | 0.237        | 1.011                                                | 0.995             | -0.002       | 0.011       |
| DW14_ALL_noS2N     | 15 | 0.189                  | 0.040         | 0.229        | 1.016                                                | 1.000             | -0.023       | 0.063       |
| DW14_ALL_S2N       | 16 | 0.204                  | 0.032         | 0.236        | 1.017                                                | 0.999             | -0.002       | 0.005       |
| DW14_SPEC_noS2N    | 17 | 0.189                  | 0.040         | 0.229        | 1.016                                                | 1.000             | -0.023       | 0.063       |
| DW14_SPEC_S2N      | 18 | 0.203                  | 0.033         | 0.236        | 1.023                                                | 1.000             | -0.001       | 0.003       |

124 **Table S2.** Summary of statistics for the different PMF tests carried out on the WFP datasets of metals.  
 125 18 downweight conditions were tested for the PMF inputs. The matrix including a S2N downweight  
 126 and errors below MDLs downweighted with  $\alpha_i = 2 \times r_{p95}$  (test n°12) was selected as final inputs.

127

128

129

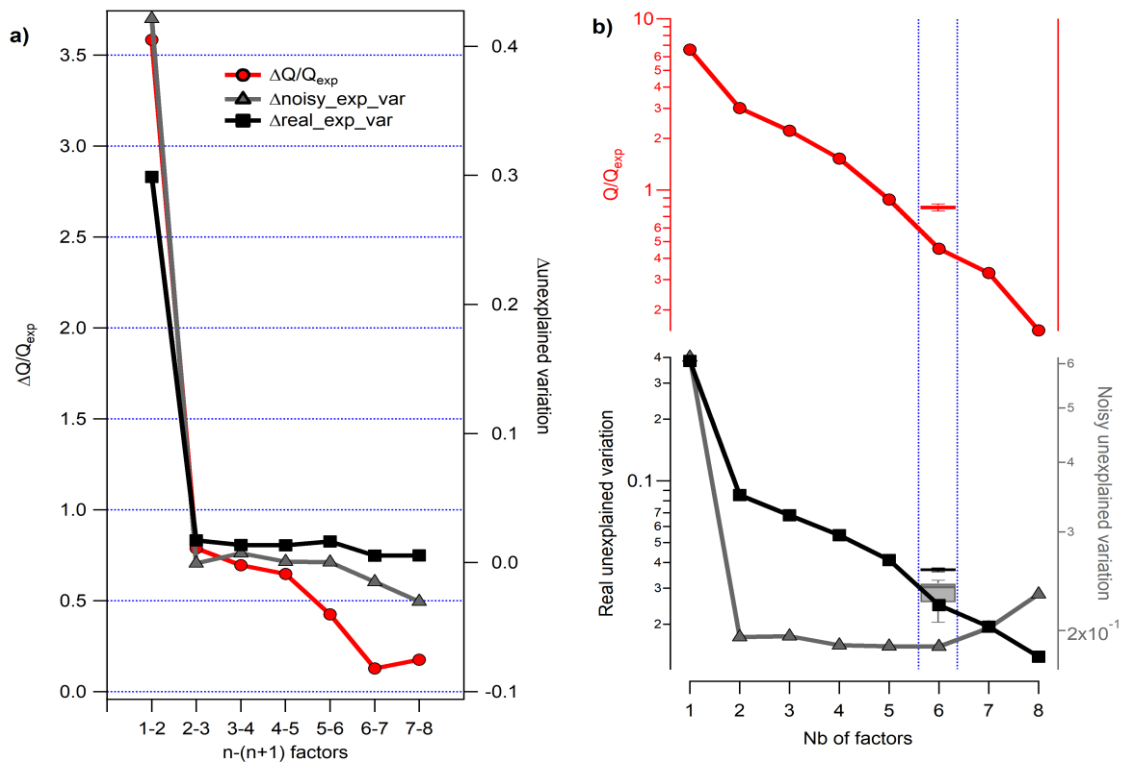

130

131 **Figure S2. (a)** Changes in  $\Delta Q/Q_{exp}$ ,  $\Delta UEV_{real}$  and  $\Delta UEV_{noisy}$  for  $n-(n+1)$ -factor  $PMF_{metals}$  runs and **(b)**  
 132  $Q/Q_{exp}$ ,  $UEV_{real}$  and  $UEV_{noisy}$  for  $PMF_{metals}$  runs from 1 to 8 factors. These  $PMF$  runs are performed for the  
 133 WFP dataset. The box plots located in the blue dashed-line area represent the values for the finalized 6-  
 134 factors bootstrap solution using the total metals dataset.

135

136



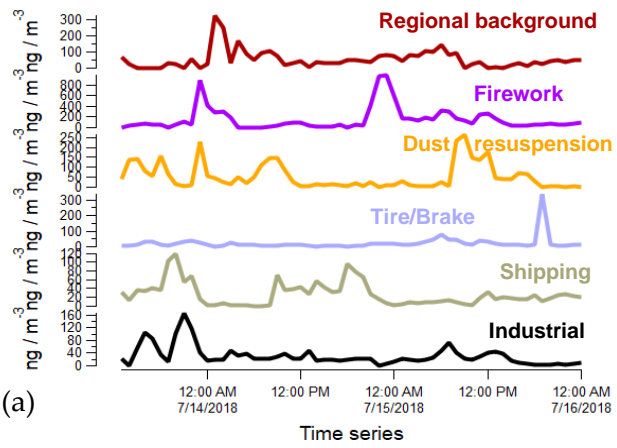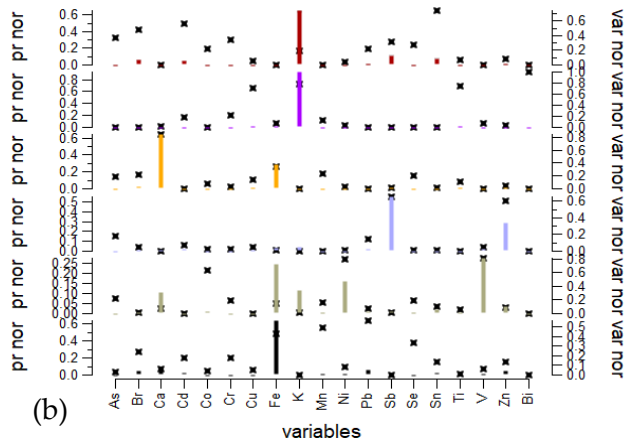

137

138 **Figure S3. (a)** Factors time series and **(b)** profiles from the PMF solution using the FDP dataset. The  
 139 regional background factor profile was constrained with an a-value of 0.1.

140

141 **Sect. S2: Criteria selection for PMF<sub>metals</sub>**

142 A first type of criterion was the use of the dominant element in the related factor. Thus, the Bi, Ca, Zn,  
143 V and Fe intensity in profiles were monitored for the Firework, Dust resuspension, Tire/brake wear,  
144 Shipping and Industrial factors, respectively. Then we inspected the r Pearson correlation with MOOA  
145 for the regional background. A last criterion was the r Pearson correlation based on the multilinear  
146 regression analysis of both shipping and industrial vs SO<sub>2</sub> concentrations. The statistical acceptance of  
147 a run was based on the comparison between the criterion scores of a factor and the second highest scores  
148 from the remaining factors (Fig. S4). For all criteria the second highest scores were much lower in every  
149 run, with some rejected scores for the firework criterion. In total 25% of the runs were discarded based  
150 on this criterion, and the remaining runs were averaged into a unique solution.

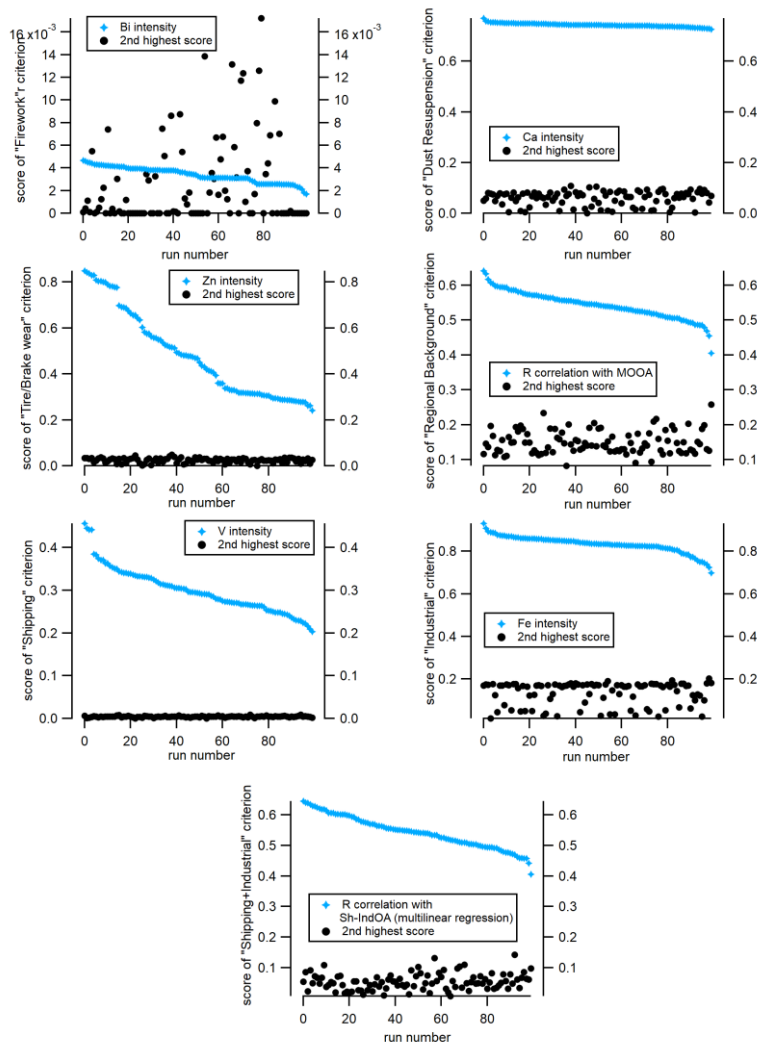

151  
152 **Figure S4.** Criteria scores for the 100 bootstrapped runs from the PMF<sub>metals</sub>. Each graph represents one  
153 criterion for the different factors. The blue markers are for the factor criterion scores and the black  
154 markers represent the second highest scores attributed to one of the remaining factors.

155

156 **Scenario and regression model selection for OP apportionment**

157 Three scenarii in the construction of the matrix of the source factors contribution to PM mass identified  
158 by the three PMF have been considered to make the best use of the results from the different PMF:

- 159 • Scenario 1: OP apportionment from independent variables with the OA factors from PMF<sub>organics</sub> (83  
160 observations), following:

$$161 \quad OP = G \times \beta_g + \varepsilon \quad (S4)$$

- 162 • Scenario 2: OP apportionment from independent variables considering only the metals factors from  
163 PMF<sub>metals</sub> (90 observations), following:

$$164 \quad OP = H \times \beta_h + \varepsilon \quad (S5)$$

- 165 • Scenario 3: OP apportionment taking as independent variables PM<sub>1</sub> factors from PMF<sub>PM1</sub> (78  
166 observations), following (Eq. S6). In this configuration, the firework episode has been removed from  
167 the data as the sources from the PMF<sub>PM1</sub> analysis have been determined without including the  
168 firework metal factor.

$$169 \quad OP = I \times \beta_i + \varepsilon \quad (S6)$$

170 In (Eq. S4, S5, S6), OP vector (p×1) is the observed OP expressed in volume unit, G matrix (g × (p+1)) of  
171 g sources (plus the intercept) is determined by PMF<sub>organics</sub>, H matrix (h × (p+1)) of h sources (plus the  
172 intercept) is determined by PMF<sub>metal</sub>, I matrix (i × (p+1)) of i sources (plus the intercept) is determined  
173 by PMF<sub>PM1</sub>, and ε vector (p×1) is the discrepancy between the model and the observations.

174 Three models were tested for the three scenarii (e.g. 9 solutions): weighted least squares linear  
175 regression (WLS), weighted robust multiple linear regression with an iterative M-estimator, and partial  
176 least square regression (PLS):

- 177 • WLS regression considers the uncertainties σ of the OP measurements by minimizing the weighted  
178 sum of squares function (WSS):

$$179 \quad WSS(\beta) = \sum_{i=1}^p w_i (y_i - \sum_{j=1}^n x_{ij} * \beta_j)^2, \quad w_i = \frac{1}{\sigma_i} \quad (S7)$$

180 where y<sub>i</sub> is the measured OP (p observations), x<sub>ij</sub> is the values of n sources determined by PMF and σ<sub>i</sub>  
181 is the OP uncertainties. This method already used in this purpose in previous studies (Borlaza et al.,  
182 2021; Weber et al., 2018, 2021) well suited to extracting maximum information from small data sets.  
183 Ordinary Least Squares (OLS) is a simple special case of WLS where σ = 1.

- 184 • Linear weighted robust regression methods by M-estimator minimizes the function ρ:

$$185 \quad M(\beta) = \sum_{i=1}^p \rho(w_i (y_i - \sum_{j=1}^n x_{ij} * \beta_j)) \quad (S8)$$

$$\rho_k(x) = \begin{cases} \frac{x^2}{2} & \text{if } |x| < k = 1.5 \\ k \left( |x| - \frac{k}{2} \right) & \text{if } |x| \geq k = 1.5 \end{cases} \quad (\text{S9})$$

187 Based on similar work in Grange et al. (2022), Huber's function  $\rho$  and  $k=1.5$  were used in this study.  
 188 This technique is adapted to data sets presenting particular events(de Menezes et al., 2021), as fireworks  
 189 on 13<sup>th</sup> and 14<sup>th</sup> of July -National day of France- in our data set. Indeed, the regression by successive  
 190 iterations implies lower weights on outliers, which tends to underestimate these points. We can note  
 191 WLS regression is a simple special case where  $\rho(x) = x^2$ .

- 192 • PLS regression is a method that reduces the predictors to a smaller set of uncorrelated components  
 193 and performs least squares regression on these components. It is especially useful when dependent  
 194 variables are highly correlated. Moreover, unlike multiple regression, PLS does not imply that the  
 195 predictors are fixed but can be measured with error, making PLS more robust to measurement  
 196 uncertainties.

197

#### 198 **OP apportionment from PMF<sub>organics</sub> (scenario 1) and PMF<sub>metals</sub> (scenario 2)**

199 M-estimator inversion model's results issued from PMF<sub>organics</sub> (scenario 1) and PMF<sub>metals</sub> (scenario 2)  
 200 alone are respectively presented in Table S 3a. and Table S 3b.  $\beta$  coefficients (i.e intrinsic OP, see 2.5)  
 201 obtained by M-estimator model from PMF<sub>metals</sub> display values an order of magnitude higher than those  
 202 issued from PMF<sub>organics</sub> inversion. This stress the importance of metals in OP apportionment, for both  
 203 assays. Among the organic factors, only the Sh-IndOA factor seems to be slightly more sensitive to  
 204 OP<sub>VDTT</sub>. The Firework factor constrains a significant part of the data, implying a fairly high Pearson's  
 205 correlation coefficient between OP<sub>model</sub> and OP<sub>observed</sub>. Nevertheless,  $R^2_{\text{adjusted}}$  of both M-estimator  
 206 inversion models in scenario 1 (only organic fraction of PM is considered) indicated that the percentage  
 207 of OP<sub>AA</sub> and OP<sub>DDT</sub> variance explained by the models is weak. On the other hand, several studies  
 208 highlighted the role of Secondary Organic Aerosol (SOA) in the oxidative potential indicating that  
 209 apportion OP from the metallic data alone is an incomplete step. Finally, the bootstrap method (see 2.5)  
 210 applied to the four M-estimator models in these two scenarii did not achieve their convergence and are  
 211 therefore not robust. Overall, this confirms that OP reflects the overall redox-activity of wide spectra of  
 212 multispecies of organics, inorganics, metals and synergistic/antagonistic reactions between these  
 213 compounds, and assess the importance to consider all these chemical compounds in the OP  
 214 apportionment process.

(a)

|                   | Intercept   | COA          | HOA          | LOOA        | MOOA        | Sh-IndOA    | $R^2$ adjusted | $r$ (OP <sub>observed</sub> /OP <sub>model</sub> ) |
|-------------------|-------------|--------------|--------------|-------------|-------------|-------------|----------------|----------------------------------------------------|
| OP <sub>AA</sub>  | 0.19 ± 0.04 | 0.00 ± 0.02  | 0.02 ± 0.01  | 0.10 ± 0.04 | 0.04 ± 0.02 | 0.24 ± 0.09 | 0.27           | 0.48***                                            |
| OP <sub>DTT</sub> | 0.38 ± 0.10 | -0.04 ± 0.10 | -0.12 ± 0.05 | 0.23 ± 0.04 | 0.1 ± 0.07  | 1.41 ± 0.15 | 0.41           | 0.51***                                            |

(b)

|                   | Intercept   | Firework    | Industrial   | Regional background | Shipping     | Tire brake | $R^2$ adjusted | $r$ (OP <sub>observed</sub> /OP <sub>model</sub> ) |
|-------------------|-------------|-------------|--------------|---------------------|--------------|------------|----------------|----------------------------------------------------|
| OP <sub>AA</sub>  | 0.36 ± 0.02 | 1.57 ± 0.16 | 3.21 ± 0.42  | 2.30 ± 0.33         | -0.74 ± 0.68 | n.c.       | 0.66           | 0.73***                                            |
| OP <sub>DTT</sub> | 0.61 ± 0.12 | 4.17 ± 0.83 | -1.24 ± 1.64 | 7.11 ± 2.30         | 17.0 ± 5.3   | 6.0 ± 4.60 | 0.38           | 0.61***                                            |

215

216

**Table S3.** Intrinsic OP<sub>AA</sub> and OP<sub>DTT</sub> (OP<sub>m</sub>) provided by weighted robust linear regression with an M-estimator expressed in nmol.min<sup>-1</sup>.µg<sup>-1</sup> of sources provided by (a) PMF<sub>organics</sub> (scenario 1) and (b) PMF<sub>metals</sub> (scenario 2) over the OP sampling campaign (n = 90). Values are the mean ± standard deviation from bootstraps runs for both OP assays. The model parameters R<sup>2</sup><sub>adjusted</sub> and Pearson's correlation between model OP and observed OP are mentioned on the right.

217

218

219

220

221

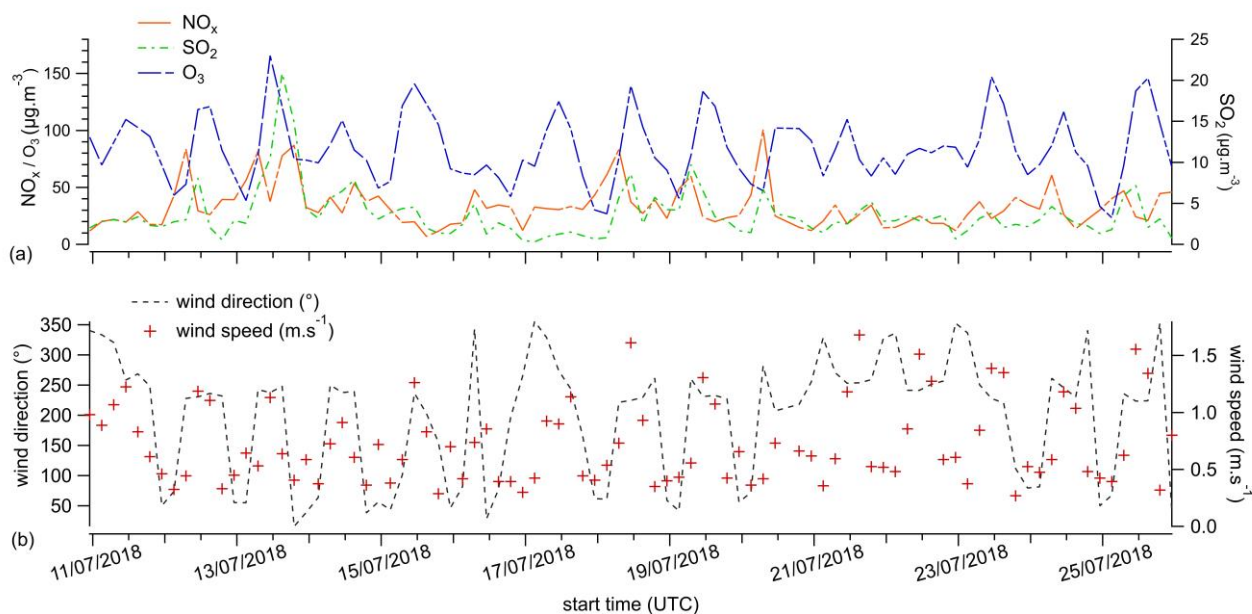

222

**Figure S5.** (a) NO<sub>x</sub>, SO<sub>2</sub> and O<sub>3</sub> concentration and (b) wind speed and direction during OP measurement period.

224

225

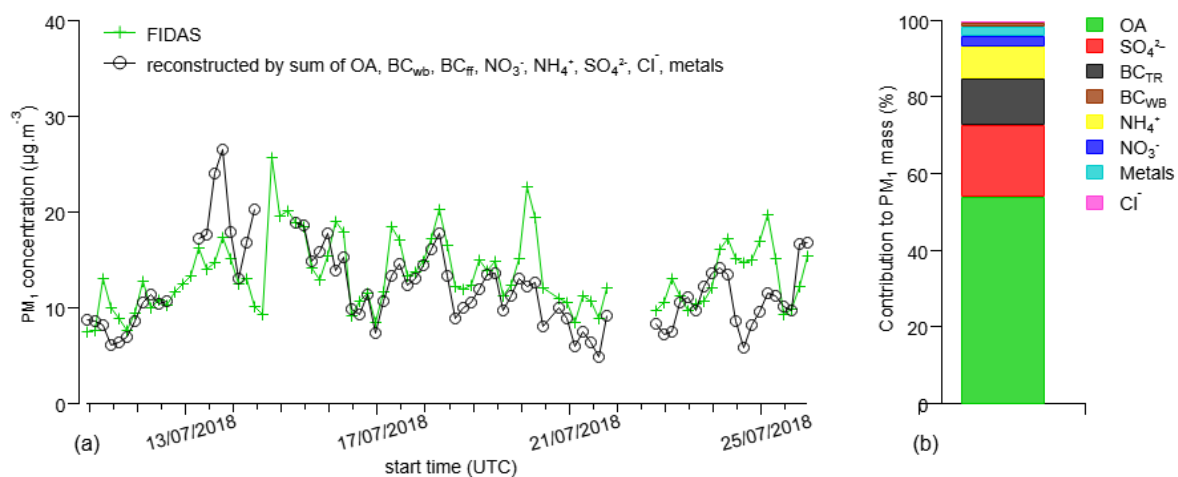

226

227 **Figure S6. (a)** Comparison between time series of PM<sub>1</sub> measured by FIDAS and time series of particulate  
 228 fraction reconstituted by the sum of chemical components ( $r_s = 0.47$ ,  $p < 0.001$ ); **(b)** Contribution to PM<sub>1</sub>  
 229 of chemical components (%) measured from 11<sup>th</sup> July 2018 to 25<sup>th</sup> July 2018 (included firework episode,  
 230  $n=91$ ) by ToF-ACSM, Xact and aethalometer online analyzers.

231

232

233

234

235

236

237

238

239

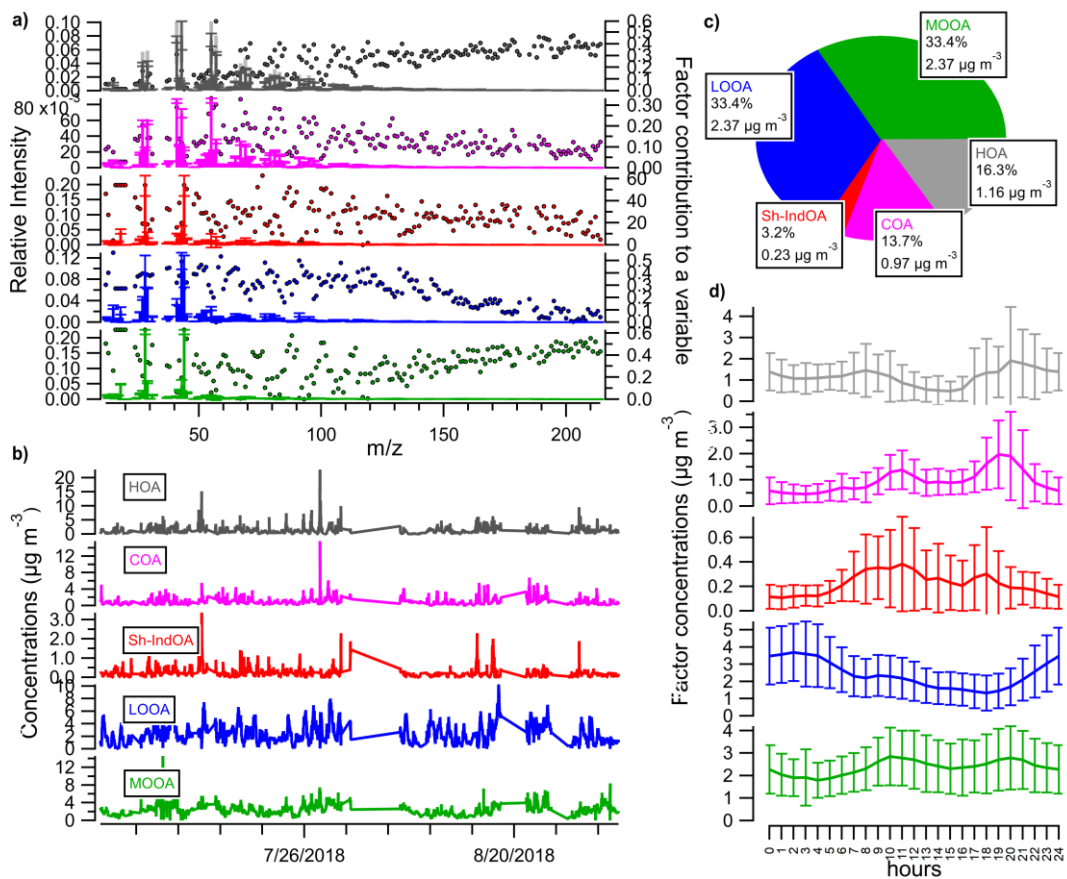

240

241 **Figure S7. (a)** Average mass spectra profiles, **(b)** time-series, **(c)** pie chart contributions and **(d)** mean  
 242 diurnal cycles (solid lines and error bars indicate the standard deviation) for the 5 factors from the  
 243 PMF<sub>organics</sub> solution.

244

245

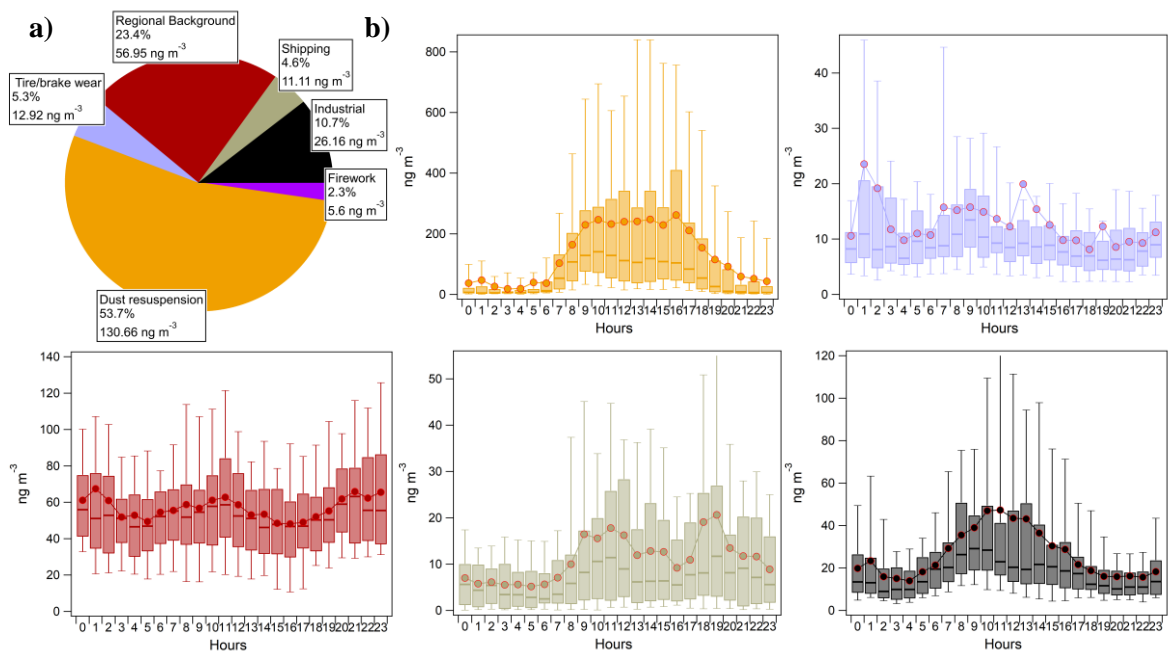

246

247 **Figure S8. (a)** Pie chart contributions and **(b)** average diurnal profiles of factors from the  $\text{PMF}_{\text{metals}}$   
 248 analysis. For the diurnal plots the red dots correspond to the mean, the bands are the median, the bottom  
 249 and top of the boxes represent the 25<sup>th</sup> and 75<sup>th</sup> percentile respectively, and the ends of the whiskers are  
 250 for the 10<sup>th</sup> and 90<sup>th</sup> percentiles.

251



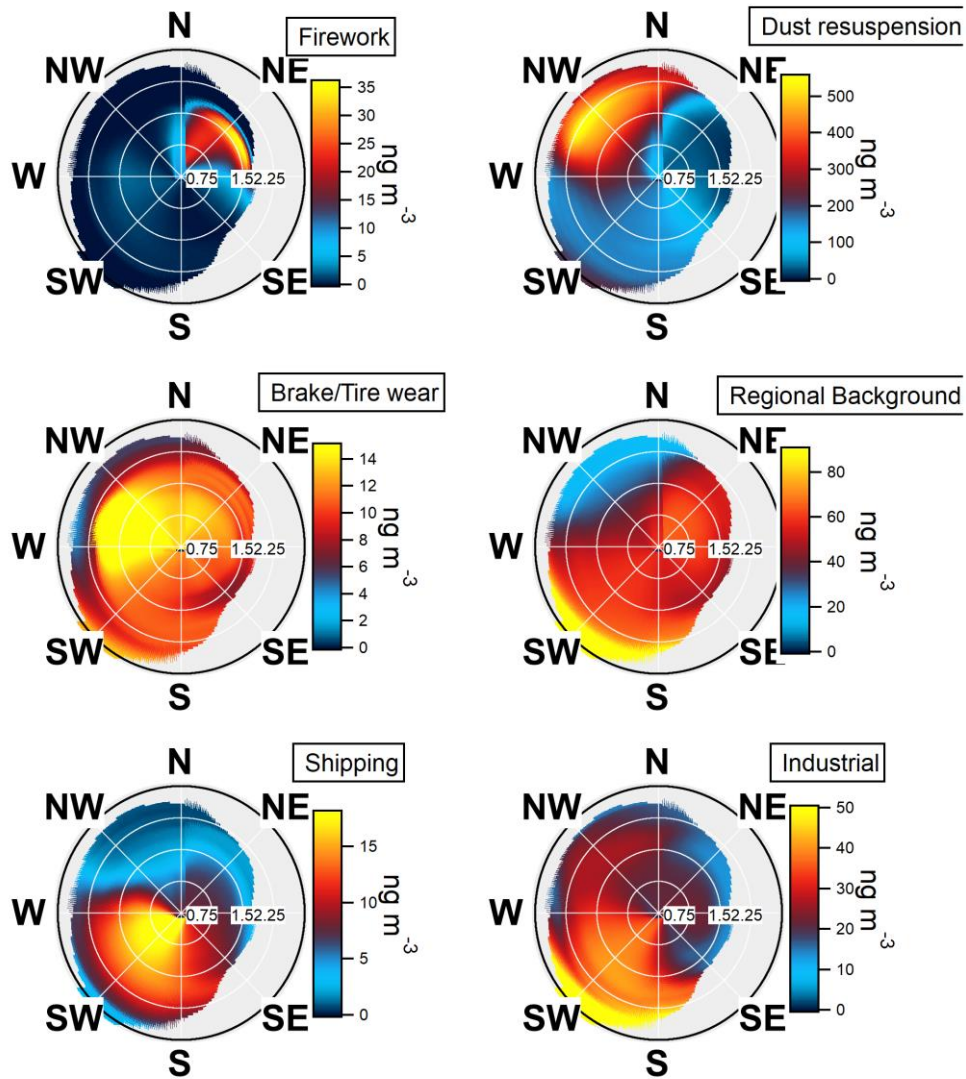

252

253 **Figure S9.** NWR plots for the different factors from the PMF<sub>metals</sub> analysis.

254

255 **Sect. S3: C-value weighting**

256 The instrument weight was controlled by applying a scaling factor (i.e. C-value) to the uncertainties of  
 257 each group of components (Slowik et al., 2010):

$$258 (\sigma'_{i,j})_s = \frac{(\sigma_{i,j})_s}{C_s} \quad (S10)$$

259  $\sigma$  represents the uncertainties,  $C$  the scaling value applied to the  $s$  datasets. Here we distinguished the  
 260 PMF<sub>organics</sub> (ACSM\_OA), PMF<sub>metals</sub> (Xact), ACSM inorganics (ACSM) and BC (AE33) datasets. A well  
 261 balanced solution should show magnitude of scaled residuals independent from the instrument. Since  
 262 their scaled residuals were rather in the same range, a C-value of 1 was chosen for ACSM\_OA, Xact and  
 263 ACSM datasets and resulted in unweighted results. However, we applied a C-value of 5 to the AE33  
 264 dataset, meaning that dataset of BC concentrations were upweighted. The overlapping of scaled  
 265 residuals from the different instrument datasets is shown in Figure .

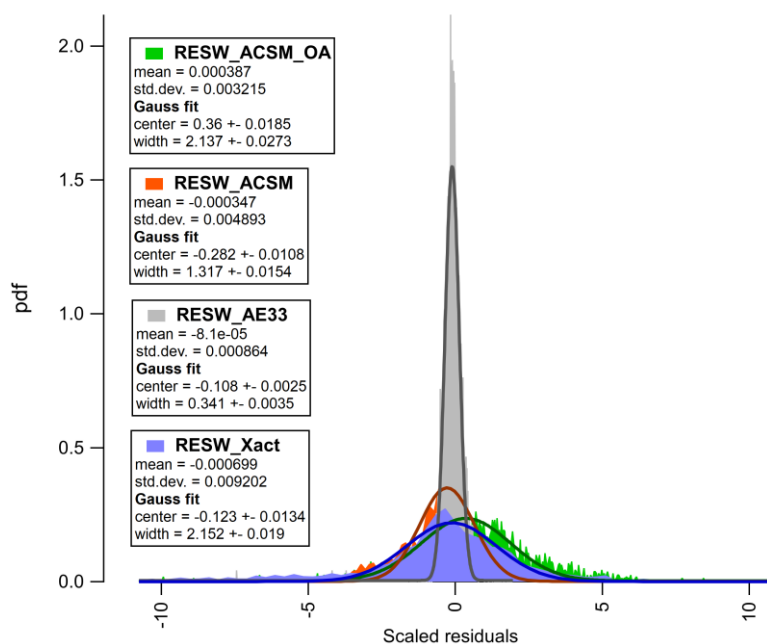

266  
 267 **Figure S10.** Probability density function of scaled residuals for the standalone ACSM\_OA, ACSM, AE33  
 268 and Xact datasets.

269

270

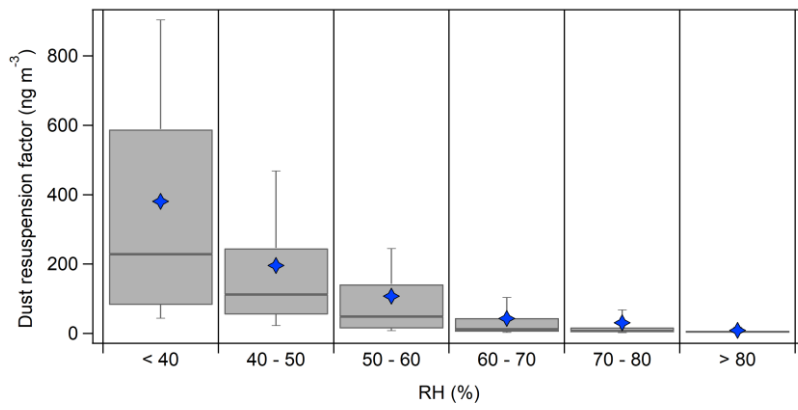

271

272 **Figure S11.** Box plots of dust resuspension factor concentrations for different relative humidity (RH)  
 273 bins in %. The concentrations are enhanced under low RH conditions. The blue diamonds are the mean,  
 274 the bars inside the boxes the median, the bottom and top of the boxes are the 25<sup>th</sup> and 75<sup>th</sup> percentile,  
 275 respectively, and the ends of the whiskers are the 10<sup>th</sup> and 90<sup>th</sup> percentiles.

276

277

278

279 **Sect. S4: Factors identification and rotational ambiguity exploration for PMF<sub>PM1</sub>**

280 Seed runs between 1 and 12 factors were examined. The factors interpretability was based on profiles  
 281 consistency and our expectations from the factors composition. The summarizes the occurrence of 8  
 282 well-identified factors in all runs between 5 and 12 factors. The choice of a 8-factors solution is supported  
 283 also by mathematical diagnostics ( $\Delta Q/Q_{exp}$ , mass reconstruction,  $\Delta UEV$  – not presented here) which  
 284 showed that realistic solutions can be found up to 5 factors. While some factors are easily resolved in  
 285 most of the solutions (e.g. dust resuspension) some others are retrieved from an elevated number of  
 286 factor (e.g. shipping and cooking are found in up to 9 factors-solution).

287 Therefore, the solution was constrained using base case profiles (Table ). The biomass burning, cooking  
 288 and industrial factors were constrained as they presented unstable profiles across the different runs.  
 289 Constraining the industrial factor allow an improved separation of the shipping factor (see the  
 290 discussion below).

291

|                   | 5F | 6F | 7F | 8F | 9F | 10F | 11F | 12F |
|-------------------|----|----|----|----|----|-----|-----|-----|
| <b>Traffic</b>    |    |    |    |    |    |     |     |     |
| <b>Dust</b>       |    |    |    |    |    |     |     |     |
| <b>AS-rich</b>    |    |    |    |    |    |     |     |     |
| <b>ON-rich</b>    |    |    |    |    |    |     |     |     |
| <b>Industrial</b> |    |    |    |    |    |     |     |     |
| <b>Shipping</b>   |    |    |    |    |    |     |     |     |
| <b>BB</b>         |    |    |    |    |    |     |     |     |
| <b>Cooking</b>    |    |    |    |    |    |     |     |     |

292 **Table S4.** Factors identification for the PMF<sub>PM1</sub> analyses between 5 and 12 factors. The green cells  
 293 represent the base case identification for the related factors. The remaining undefined factors for each  
 294 solution corresponded to mixed profiles not attributed to a specific source. The red squares are the base  
 295 cases used as reference profile constraints.

296 To inspect the best combination of a-values for the profile constraints, we performed a-values sensitivity  
 297 analyses by scanning a-values from 0 to 0.5 with increment of 0.05, leading to 1330 outcomes. The  
 298 goodness of the solutions was examined with a criteria selection list and the scores are presented in the  
 299 Figure . First, the R<sup>2</sup> correlations between biomass burning, cooking and industrial factors with their  
 300 corresponding constraint were monitored. Then, we monitored the intensity of the dominant variable  
 301 in the related factor profiles: Dust<sub>metals</sub> for dust resuspension, BC<sub>FF</sub> for traffic, LOOA for ON-rich, SO<sub>4</sub><sup>2-</sup>  
 302 for AS-rich and Sh-IndOA for shipping. Sh-IndOA was inspected instead of shipping<sub>metals</sub> to ensure a  
 303 clear separation between shipping and industrial factors since Sh-IndOA is assumed to only be  
 304 attributed to these two factors. For the first seven criteria, the scores were much higher than the second  
 305 highest scores (not displayed in the graph). Therefore, some runs were only discarded based on the

306 shipping criterion as we only selected the runs whose Sh-IndOA intensity was in the same range than  
 307 the base case profile from the preliminary analyses. Moreover, the selected runs (green markers in  
 308 Figure ) showed similar scores intensity for traffic, ON-rich, AS-rich and dust resuspension than those  
 309 found in their respective base case profile. In the end, the same criteria list was used for the bootstrap  
 310 runs selection.

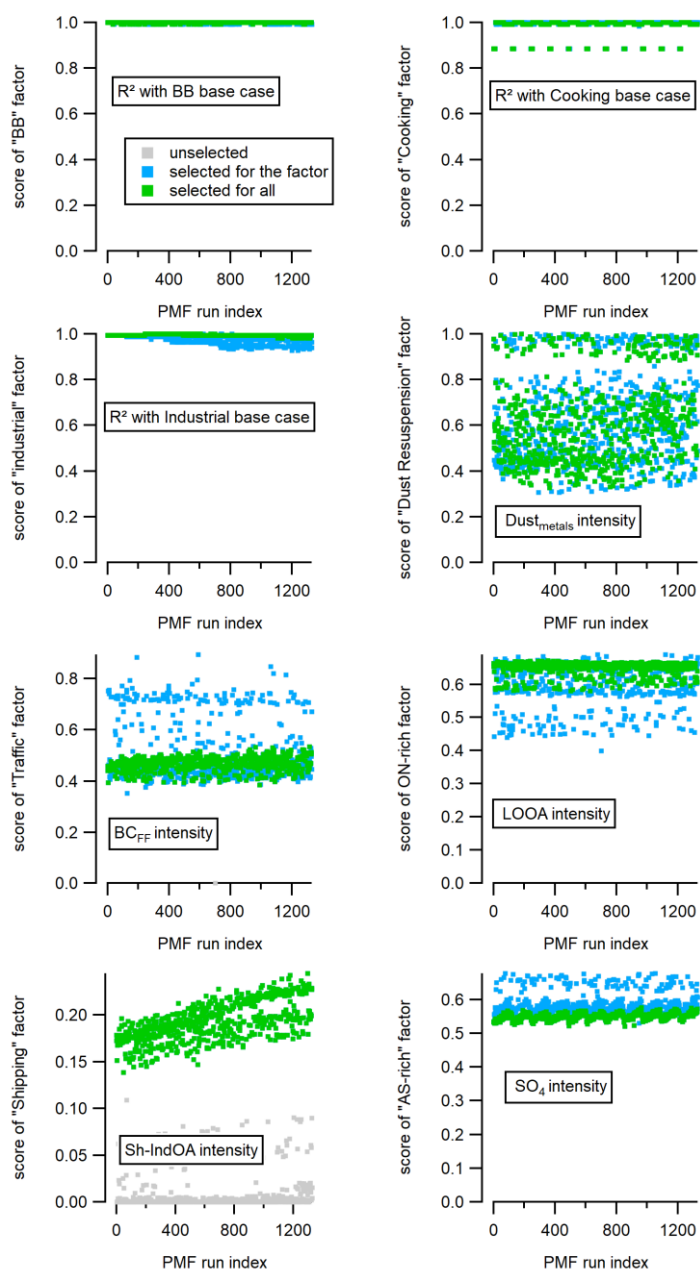

311  
 312 **Figure S12.** Criteria scores for the a-values sensitivity test runs from the PMF<sub>PM1</sub>. Each graph represents  
 313 one criterion per factor. The grey markers are the unselected runs, the blue markers are the selected  
 314 runs for the related factor and the green markers are the effectively chosen runs.

315

316

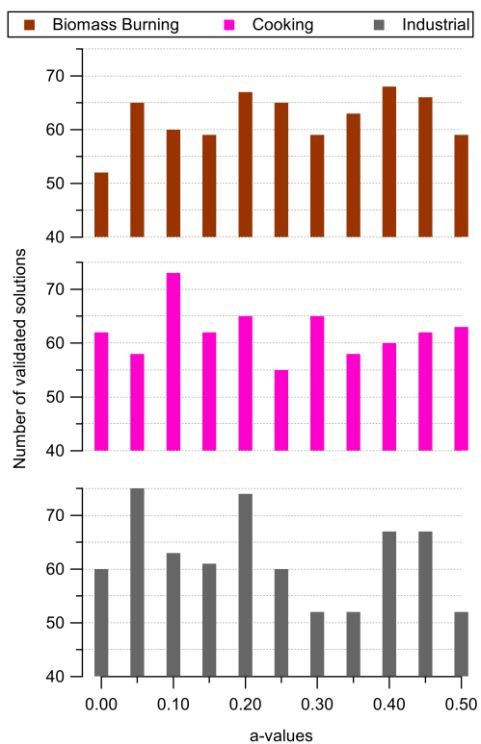

317

318 **Figure S13.** Number of accepted solutions based on the PMF<sub>PM1</sub> criteria list for the different a-values  
 319 explored in the sensitivity test. A-values associated to the greatest number of validated solutions were  
 320 chosen for the bootstrap PMF runs (i.e. 0.4 for biomass burning, 0.1 for cooking and 0.05 for industrial  
 321 constrained profiles).

322

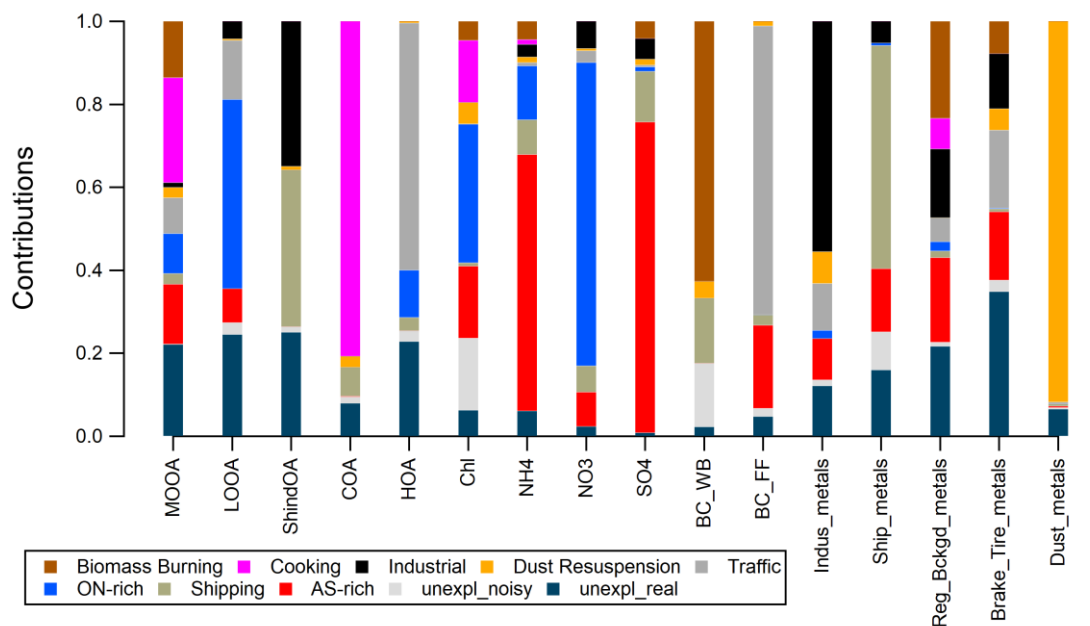

323

324 **Figure S14.** Relative contributions of PM<sub>1</sub> factors profiles and unexplained variations from the PMF<sub>PM1</sub>  
 325 analysis.

326

327

328

329

330

331

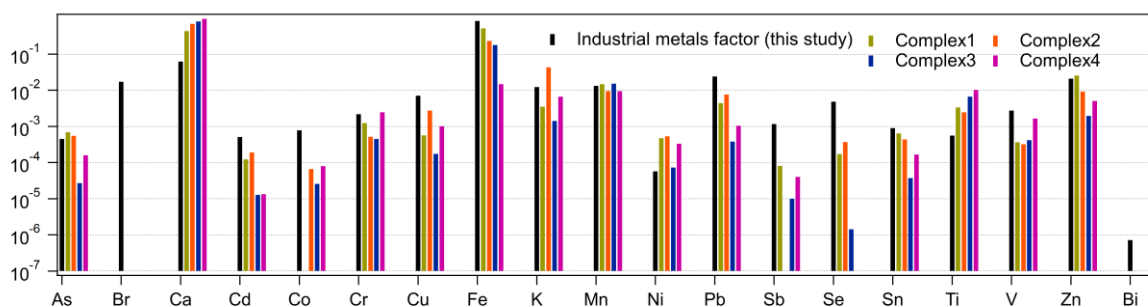

332

333 **Figure S15.** Comparison between the industrial metals profile from our study and ICP-MS profiles for  
 334 the PM<sub>2.5</sub> fraction in the industrial area of Fos-sur-mer (Sylvestre et al., 2017). Complex n°1 is a cast iron  
 335 converter complex, complex n°2 is a ore iron converter complex, complex n°3 is a blast furnace slag  
 336 storage and complex n°4 is an ore terminal.

337

338

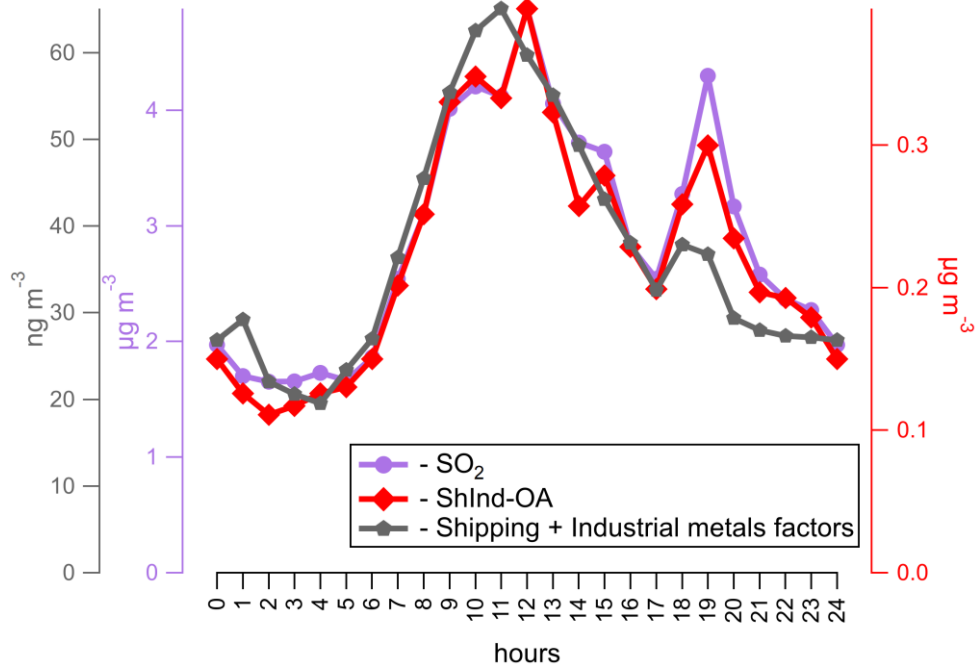

339

340 **Figure S16.** Average diurnal profiles for SO<sub>2</sub>, Sh-IndOA and the sum of industrial and shipping factors  
 341 from the PMF<sub>metals</sub>.

342



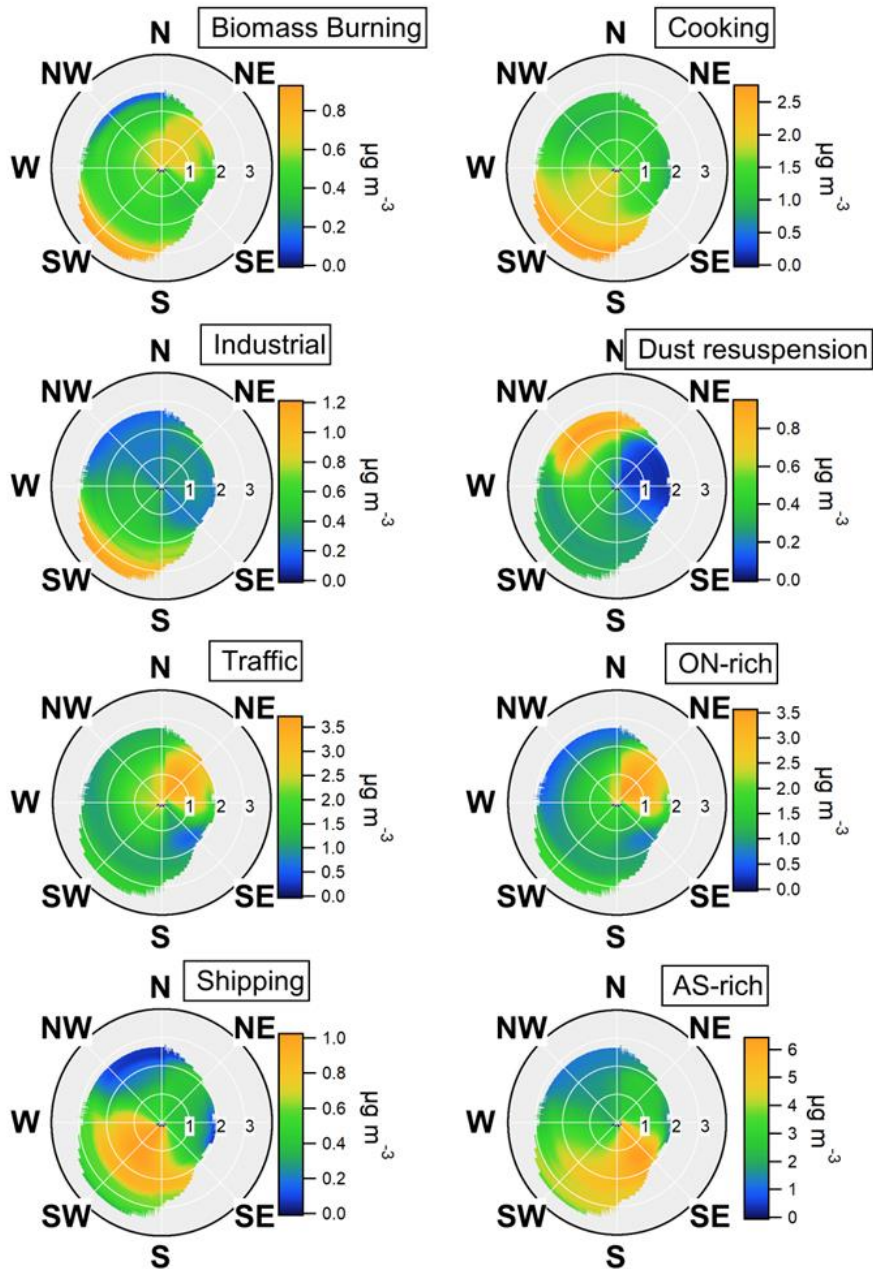

343

344 **Figure S17.** NWR plots for each factor of the PMF<sub>PM1</sub> analysis.

345

346 **Sect. S5: PMF<sub>PM1</sub> with OA factors + metals + ions + BC dataset:**

347 Among the 8 identified factors, 4 were not systematically resolved across the several preliminary runs  
 348 (cooking, biomass burning, industrial and shipping factors). The solution was constrained using base  
 349 case profiles from the 10 factors-solution for industrial, the 11 factors-solution for cooking and shipping,  
 350 and the 12 factors-solution for biomass burning. Note that for each run we applied the same C-values  
 351 for the instrument weighting than PMF<sup>2</sup> solution. A bootstrap analysis was performed for 100 runs and  
 352 the accepted runs based on the pre-defined list of criteria (the correlation with base case profiles for the  
 353 constrained factors and the monitoring of the dominant variable intensity for the unconstrained factors)  
 354 were averaged into a definitive solution.

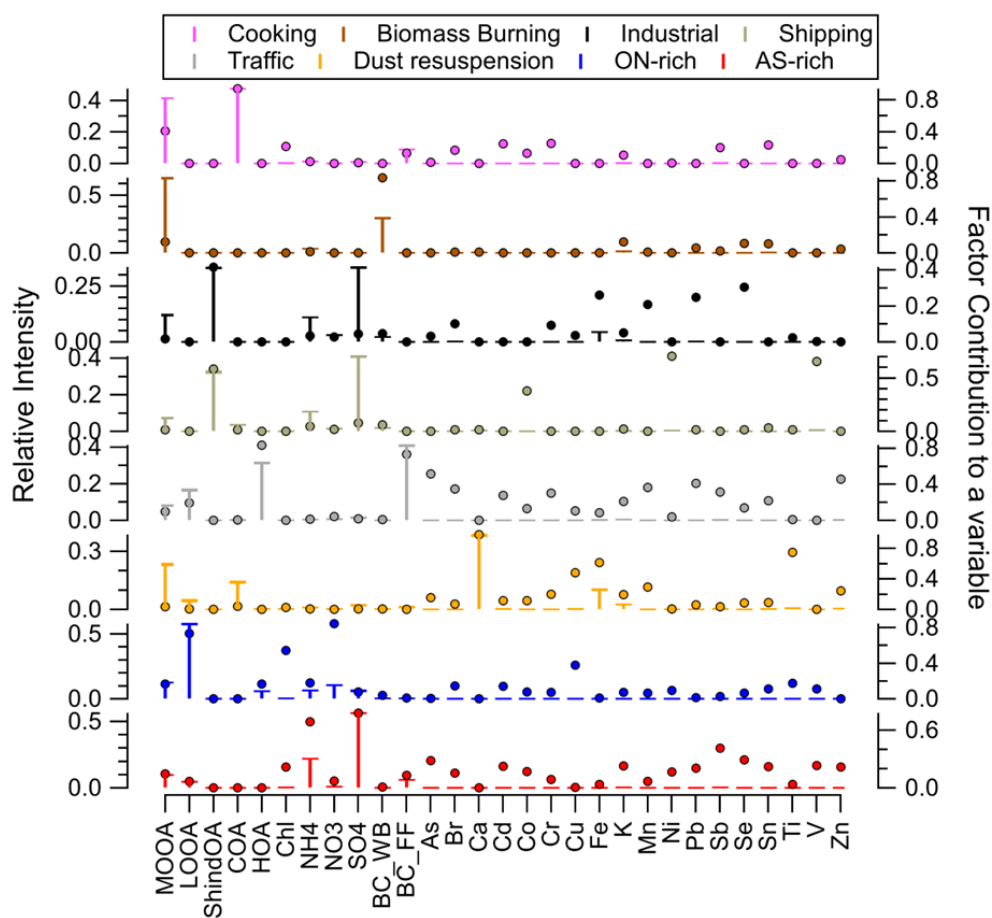

355  
 356 **Figure S18.** Average factor profiles for the PMF<sub>PM1</sub> solution using OA factors, ACSM inorganic species,  
 357 BC and metals as inputs. The sticks represent the normalized contribution of the variable to the factor  
 358 (left axis) and markers show the normalized factor contribution to each variable (right axis).

359  
 360  
 361  
 362

|                   | R <sup>2</sup> with PMF <sup>2</sup> factors | Slope with PMF <sup>2</sup> factors | Relative contribution (%) |
|-------------------|----------------------------------------------|-------------------------------------|---------------------------|
| Cooking           | 0.97                                         | 1.18                                | 17.4                      |
| Biomass Burning   | 0.93                                         | 0.65                                | 3.3                       |
| Industrial        | 0.95                                         | 0.95                                | 2.5                       |
| Shipping          | 0.81                                         | 0.52                                | 3.6                       |
| Traffic           | 0.96                                         | 1.02                                | 21.5                      |
| Dust resuspension | 0.99                                         | 1.07                                | 2.6                       |
| ON-rich           | 1                                            | 1.15                                | 23.1                      |
| AS-rich           | 0.99                                         | 0.98                                | 26                        |

363

364 **Table S5.** R<sup>2</sup> and slope values for the comparison of the PMF<sub>PM1</sub> (OA factors + metals + ions + BC) factors  
365 with PMF<sup>2</sup> factors. The relative contributions are also represented (in %).

366

367 **Sect. S6: PMF<sub>PM1</sub> with organic m/z fragments + metals + ions + BC dataset:**

368 This analysis was conducted by merging all datasets prior to analysis, including the organic fragments  
369 (from m/z 12 to 100), metals, BC fractions, NO<sub>3</sub><sup>-</sup>, SO<sub>4</sub><sup>2-</sup>, NH<sub>4</sub><sup>+</sup> and Cl<sup>-</sup>. The data inputs were previously  
370 averaged on a similar 1h-time step. This approach could retrieve only 7 sources, and increasing the  
371 number of factors did not lead to physically reasonable solutions. The results were compared to the  
372 PMF<sup>2</sup> solution.

373 We successfully identified similar factors than previous methods, with consistent R<sup>2</sup> correlations:  
374 shipping (0.77), dust resuspension (0.99), industrial (0.80) and AS-rich (0.97). However, the  
375 identification of the 3 other factors remains challenging. The 5<sup>th</sup> factor was characterized by an organic  
376 m/z spectra showing a high affinity with the MOOA profile (Figure A2) and some elements which were  
377 present in the regional background profile from the PMF<sub>metals</sub> (Br, Sn, K). The 6<sup>th</sup> factor presented a  
378 moderate correlation with the ON-rich factor from PMF<sup>2</sup> approach (R<sup>2</sup>= 0.67) but unexpectedly featured  
379 a high contribution of BC<sub>FF</sub> which might be due to some mixing of this factor to traffic.

380 The last factor is interpreted as a result of the mixing of traffic and cooking sources. This lack of clear  
381 separation is attributed to the very similar mass spectra profiles of HOA and COA for the organic  
382 fraction, which are difficult to deconvolve without applying specific constraints (Chazeau et al., 2022;  
383 Chen et al., 2022). The mixing is also evident in the factor's diurnal evolution with unseparated morning  
384 and mid-day peaks. Furthermore, the biomass burning source was not resolved in this solution.

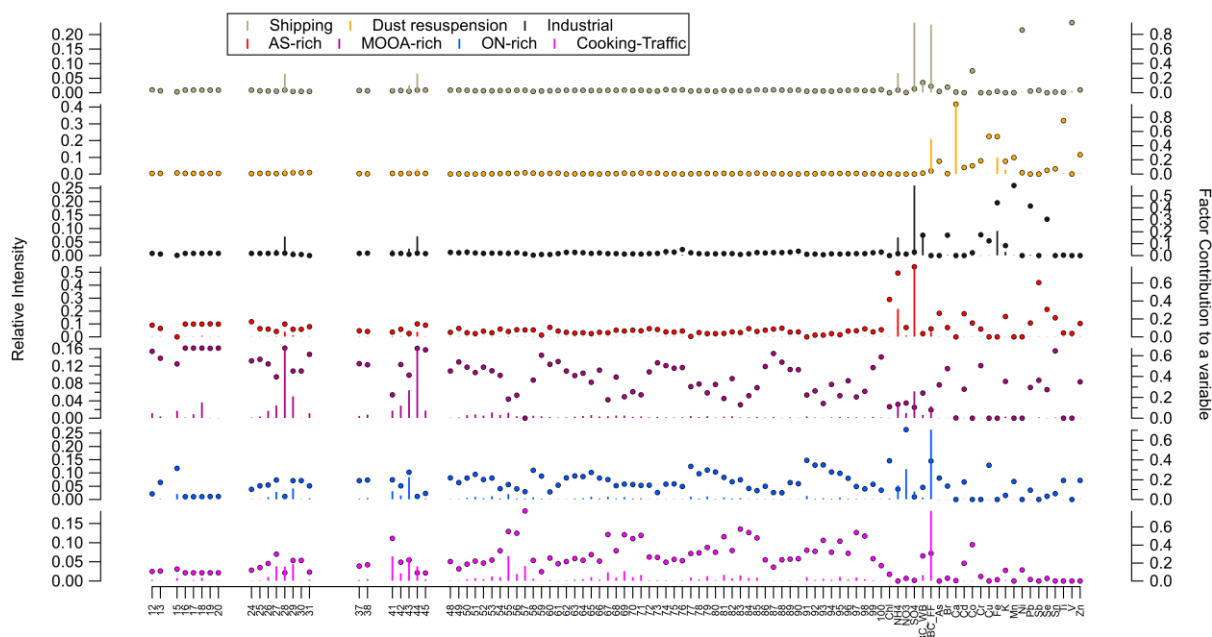

385  
 386 **Figure S19.** Factor profiles from the PMF solution using organic m/z fragments, ACSM inorganic  
 387 species, BC and metals as inputs. The sticks represent the normalized contribution of the variable to the  
 388 factor (left axis) and markers show the normalized factor contribution to each variable (right axis).

389  
 390 **Associations between both OP and sources of PM**

391 Pearson's correlation coefficients ( $r$ ) between the source factor contributions identified by the  $PMF_{PMI}$   
 392 and both OP assays are presented in Table S6 with the idea to provide a first estimate of the associated  
 393 sources with OP. We note that no source strongly correlates alone to both OP assays, but moderate  
 394 correlations ( $0.3 < r < 0.5$ ) can be noted for both OP vs. Traffic source ( $OP_{VAA}$ :  $r=0.40$ ,  $p < 0.001$  -  $OP_{VDTT}$ :  
 395  $r=0.34$ ,  $p < 0.01$ ) and Shipping source ( $OP_{VAA}$ :  $r=0.32$  -  $OP_{VDTT}$ :  $r=0.30$ ,  $p < 0.01$ ).  $OP_{VAA}$  also correlates  
 396 moderately with Industrial source ( $r=0.41$ ,  $p < 0.001$ ) and ON-rich source ( $r=0.32$ ,  $p < 0.01$ ). Finally,  $OP_{VDTT}$   
 397 displays a mild correlation with AS-rich source ( $r=0.36$ ,  $p < 0.01$ ), but this correlation might be attributed  
 398 to a collinearity with PM mass ( $r OP_{VDTT}$  vs  $SO_4^{2-}=0.46$ ,  $r OP_{VDTT}$  vs  $NH_4^+=0.47$  -  $p < 0.001$ ).

399

|             | Biomass<br>Burning | Cooking | Industrial | Dust<br>resuspension | Traffic | ON-<br>rich | Shipping | AS-<br>rich |
|-------------|--------------------|---------|------------|----------------------|---------|-------------|----------|-------------|
| $OP_{VAA}$  | 0.15               | 0.18    | 0.41***    | 0.13                 | 0.40*** | 0.32***     | 0.32**   | 0.17        |
| $OP_{VDTT}$ | 0.12               | -0.02   | 0.14       | 0.14                 | 0.34**  | 0.19        | 0.30     | 0.36**      |

\*\*\* $p < 0.001$ , \*\* $p < 0.01$

400 **Table S6.** Pearson's correlation coefficients between  $OP_{VAA}$  and  $OP_{VDTT}$  to the PM sources identified by  
 401  $PMF_{PMI}$  model.

402

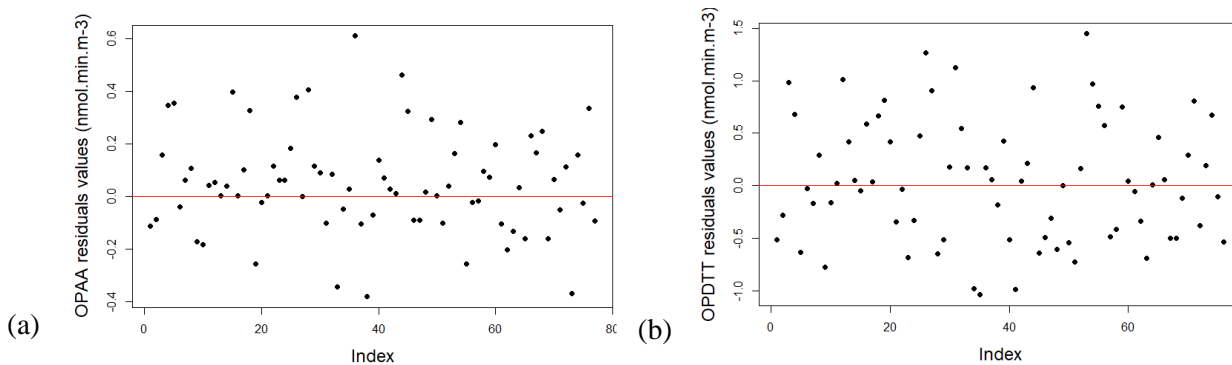

**Figure S20.** Residuals values of WLS models for **(a)**  $OP_{AA}$  and **(b)**  $OP_{DTT}$ . An outlier point (19 July 2018 03:00) was withdrawn to ensure homoscedasticity of residuals values.

403

404

405

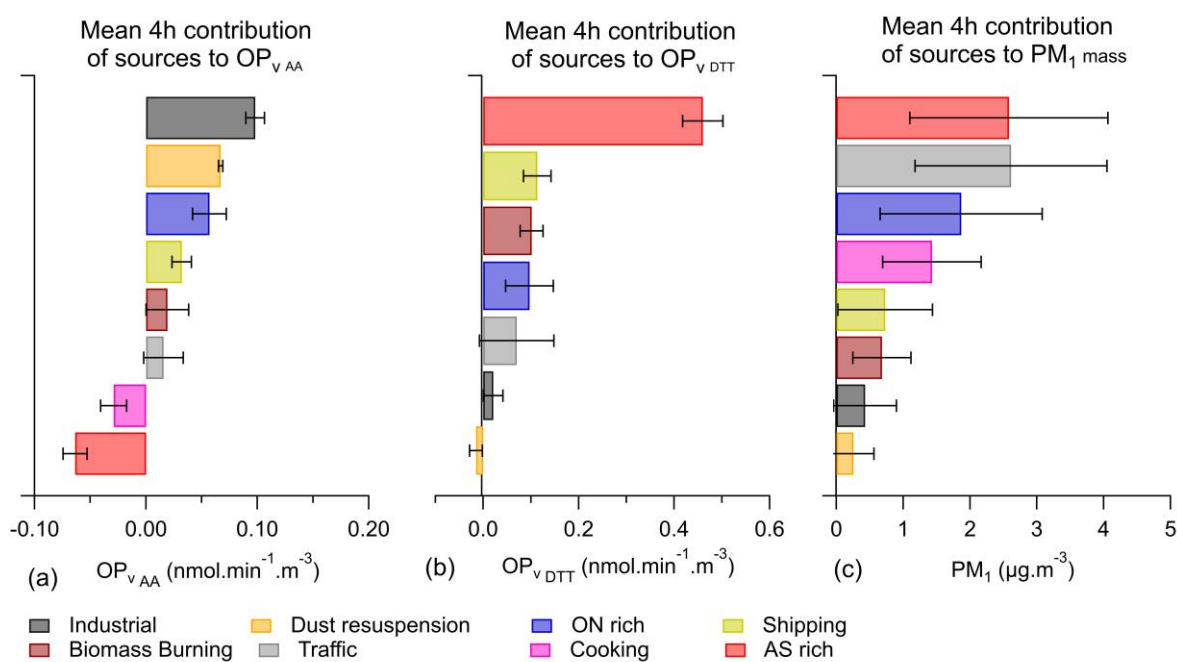

**Figure S21.** Mean contribution of the sources identified by  $PMF_{PM1}$  over the OP sampling campaign ( $n = 86$ ) to **(a)**  $OP_{AA}$ , **(b)**  $OP_{DTT}$ , **(c)**  $PM_1$ . Error bars represents the standard deviation of the data distribution.

406

407
